# Supplementary material for: Brain trauma elicits non-canonical macrophage activation states
Source: PubMed Central journal article supplement (PMC4879757; doi:10.1186/s12974-016-0581-z), 2016-05-24

Figure S2

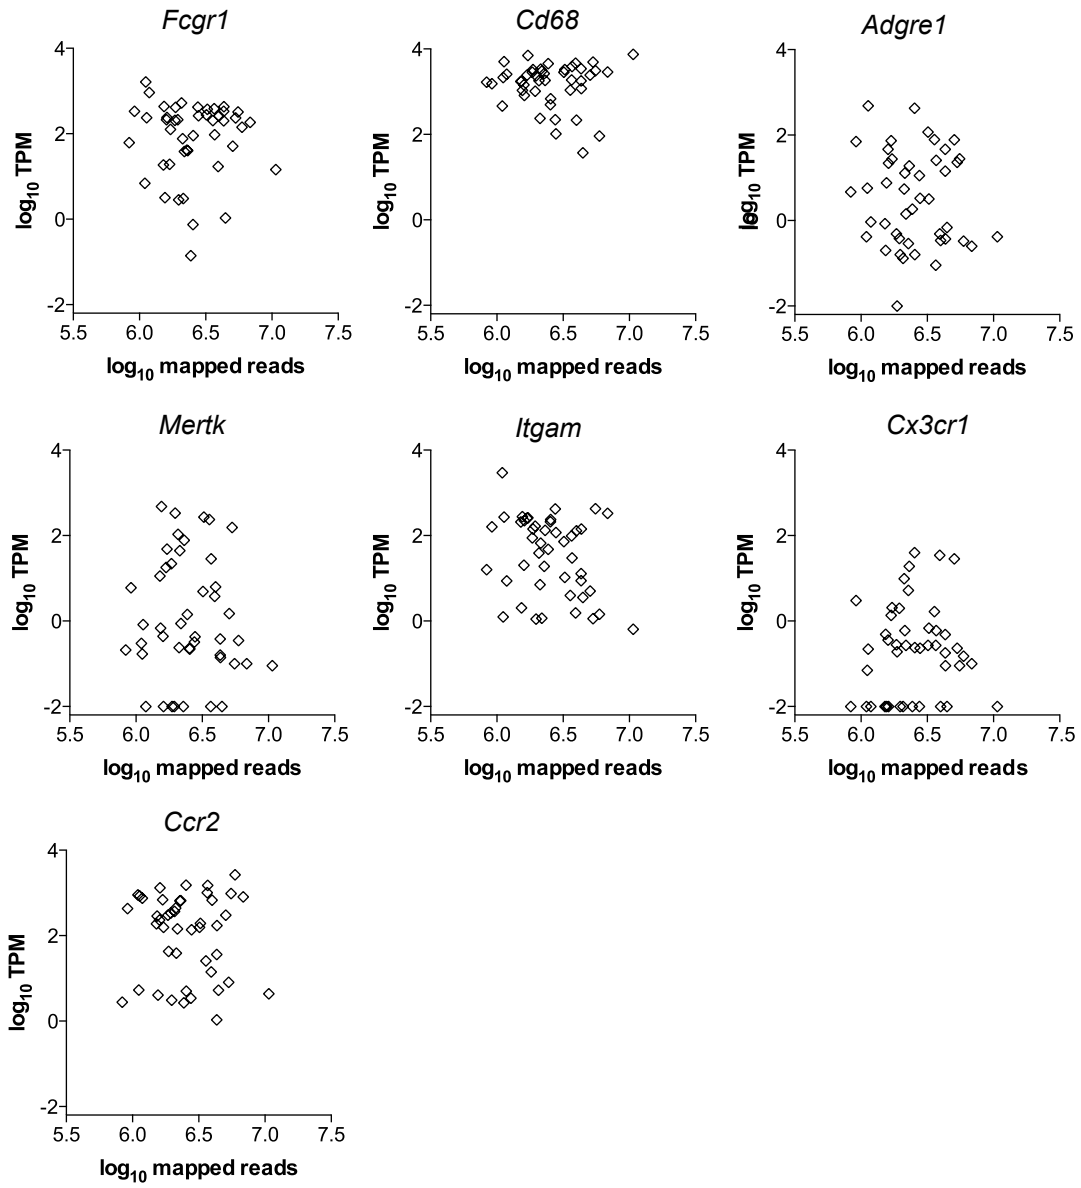

Supplement: 12974_2016_581_MOESM2_ESM.pdf [file 12974_2016_581_MOESM2_ESM.pdf]
